# Supplementary material for: Catalysis of Silver and Bismuth in Various Epoxy Resins
Source: MDPI journal article supplement (doi:10.3390/polym16030439), 2024-02-05
Supplement: s1 [file s1]

## **Supplementary information**

### **Catalysis of silver and bismuth in various epoxy resins**

*Hayun Jeong and Keon-Soo Jang\**

*Department of Polymer Engineering, School of Chemical and Materials Engineering, The  
University of Suwon, Hwaseong, Gyeonggi-do, 18323, Republic of Korea*

**CORRESPONDING AUTHOR FOOTNOTE** \*To whom correspondence should be addressed. K.-S. Jang: [ksjang@suwon.ac.kr](mailto:ksjang@suwon.ac.kr)

Table S1. Mass of uncured and cured (150 °C) DGEBA-MAn with different Ag and Bi loadings

| Curing time    | 0 min (g) | 1 h (g) | 24 h (g) |
|----------------|-----------|---------|----------|
| Pristine epoxy | 2.359     | 2.355   | 2.351    |
| Bi 5 vol%      | 2.403     | 2.391   | 2.388    |
| Bi 20 vol%     | 2.590     | 2.512   | 2.491    |
| Ag 5 vol%      | 2.421     | 2.413   | 2.381    |
| Ag 20 vol%     | 2.411     | 2.409   | 2.406    |

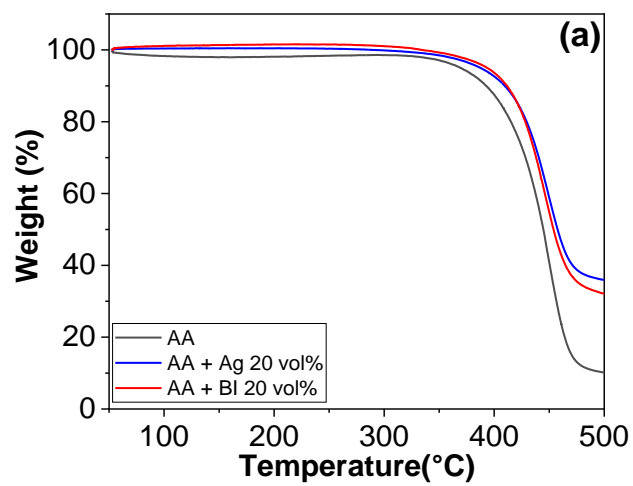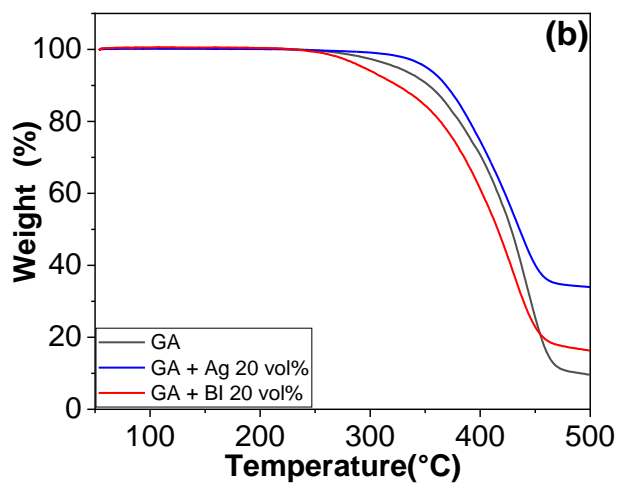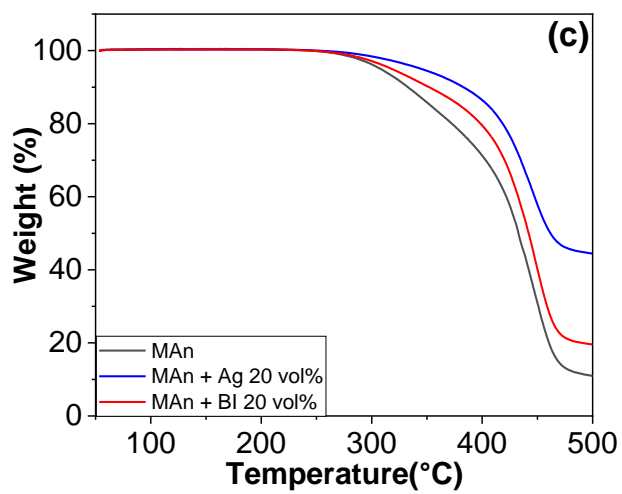

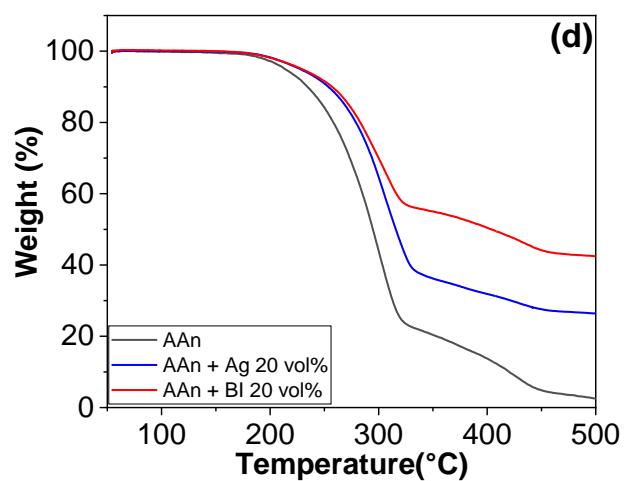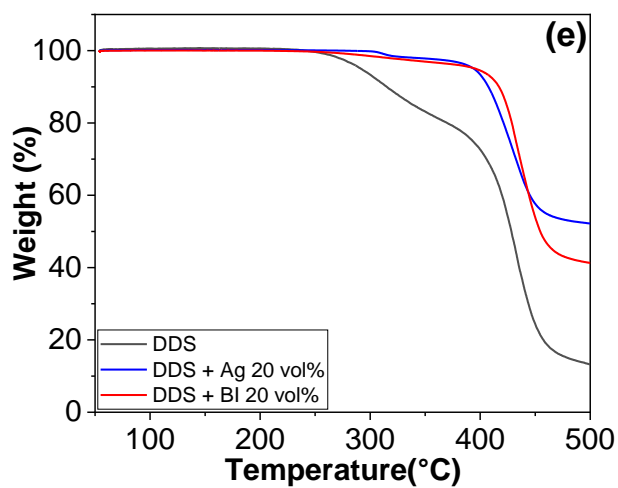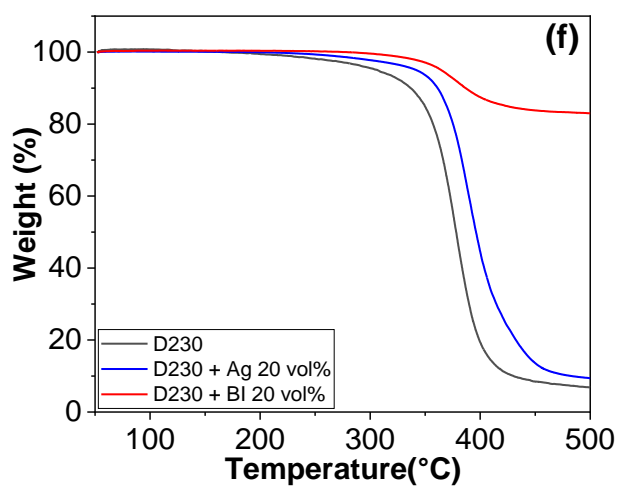

Figure S1. TGA graphs of pristine and metal-embedded cured epoxy resins with different curing agents: (a) AA, (b) GA, (c) MAn, (d) ACA, (e) DDS, and (c) D230.

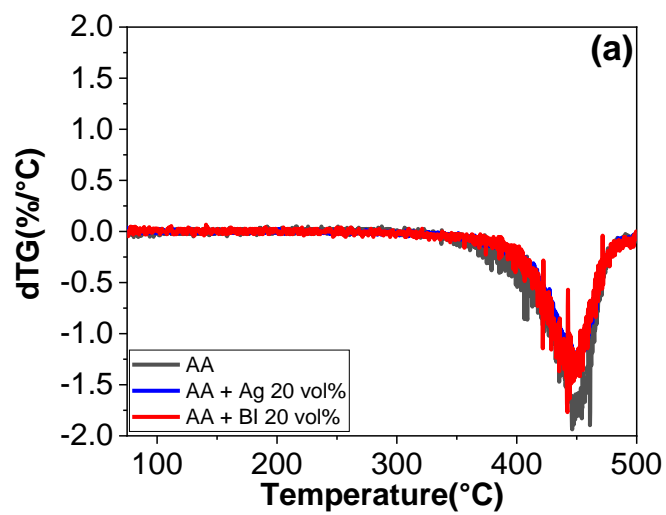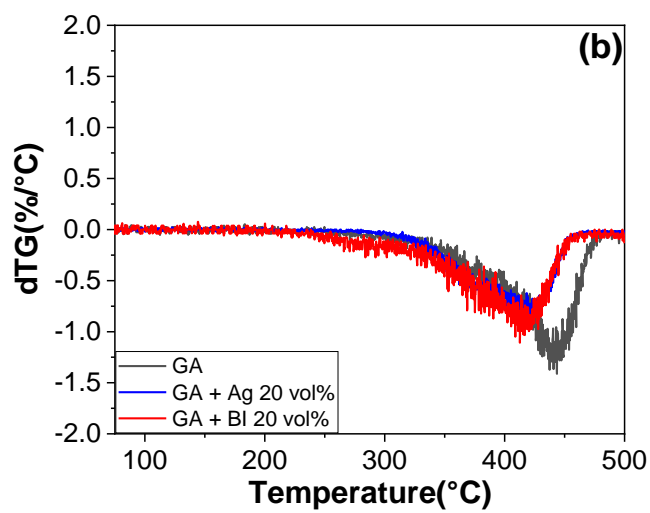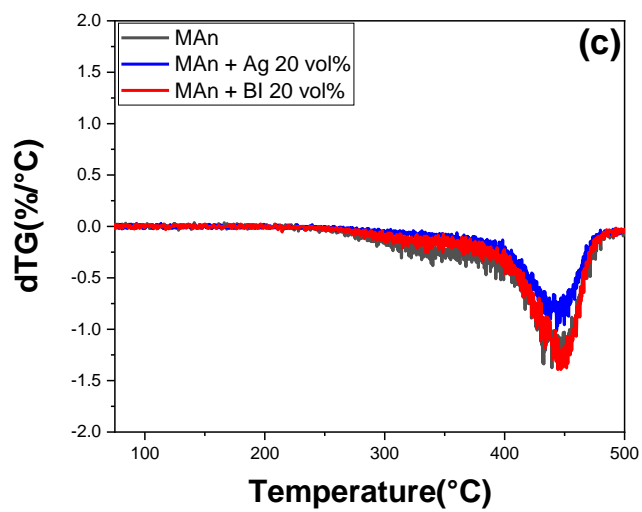

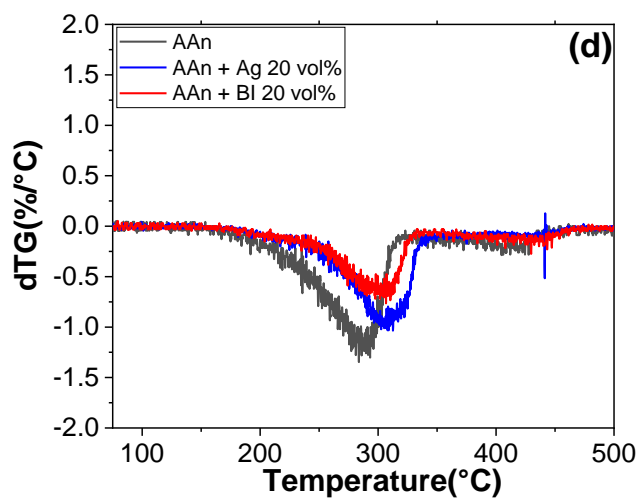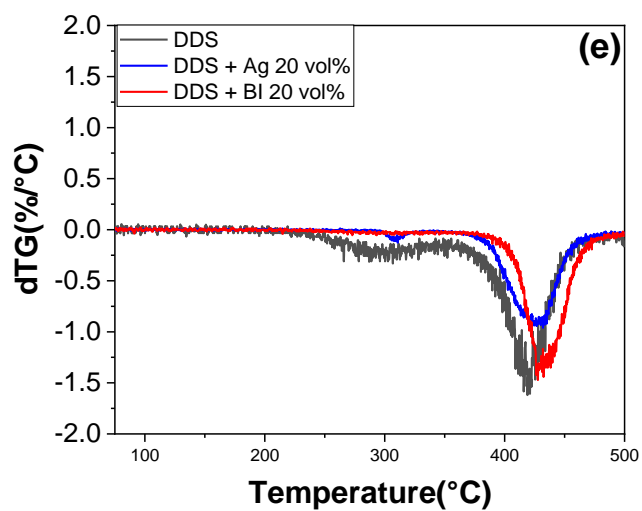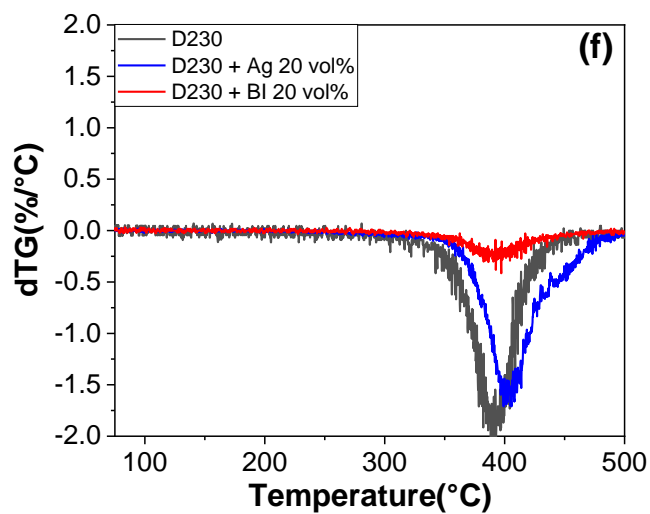

Figure S2. dTG graphs of pristine and metal-embedded cured epoxy resins with different curing agents: (a) AA, (b) GA, (c) MAn, (d) ACA, (e) DDS, and (c) D230.

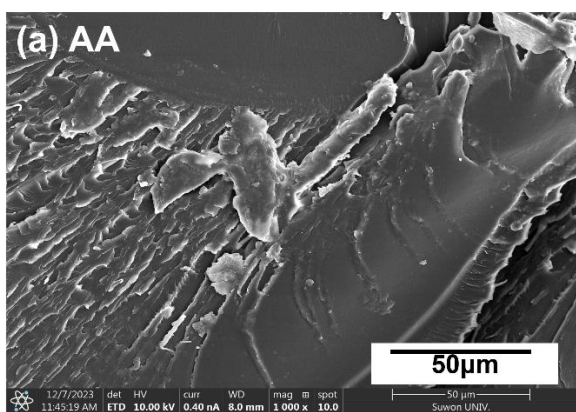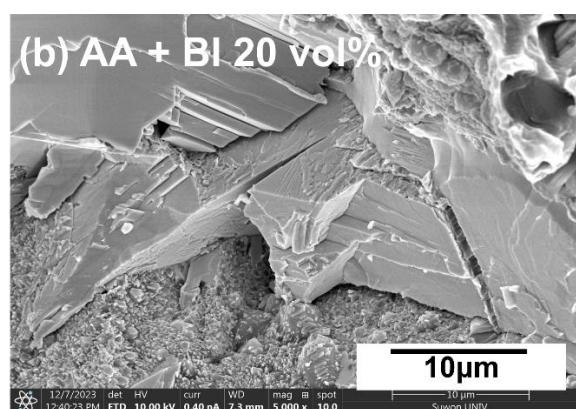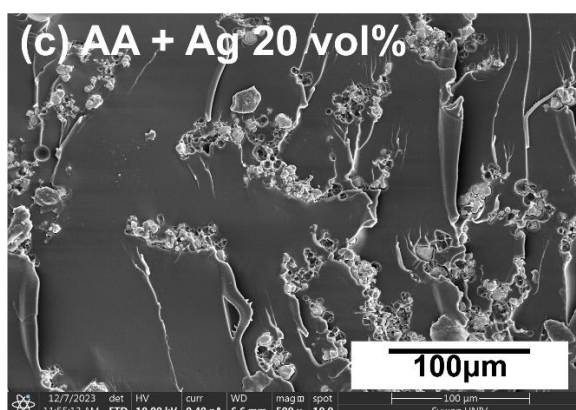

Figure S3. SEM images of fractured surfaces of DGEBA-AA systems with different metals: (a) None, (b) 20 vol% Bi, and (c) 20 vol% Ag.

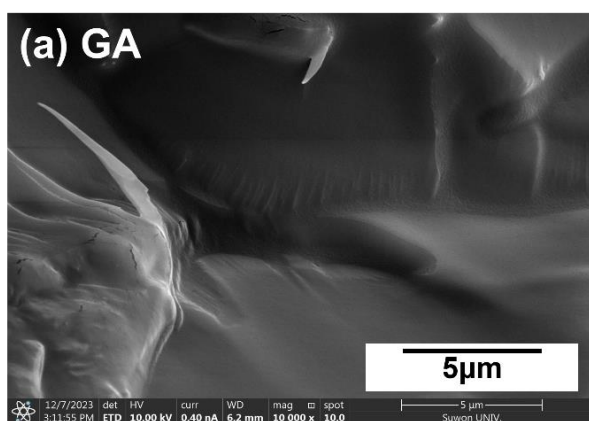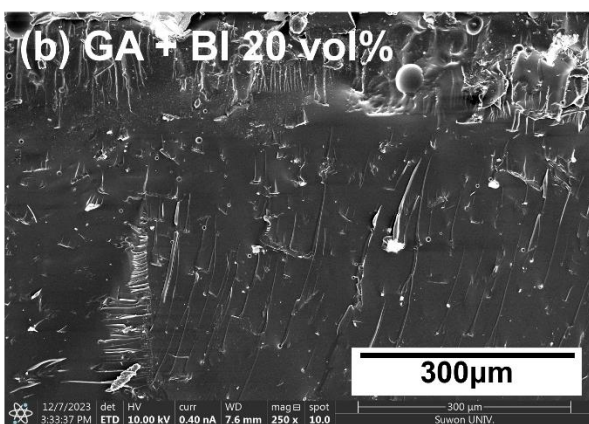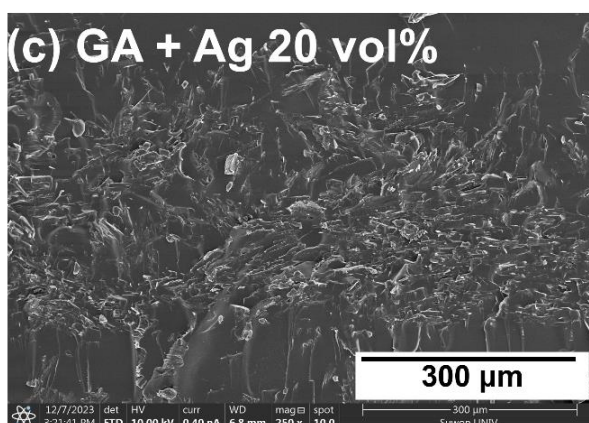

Figure S4. SEM images of fractured surfaces of DGEBA-GA systems with different metals: (a) None, (b) 20 vol% Bi, and (c) 20 vol% Ag.



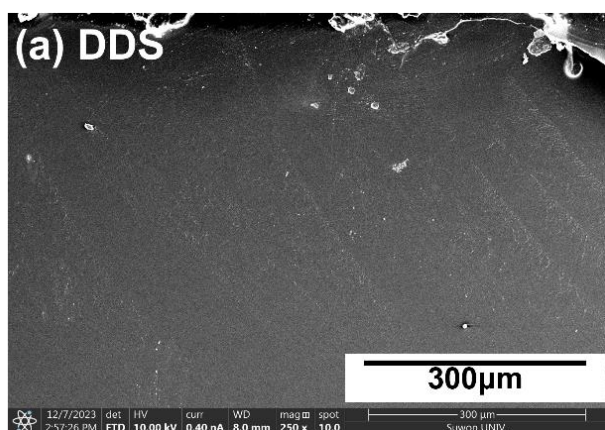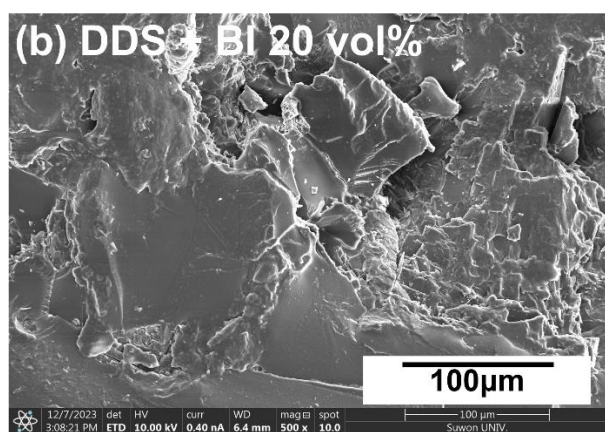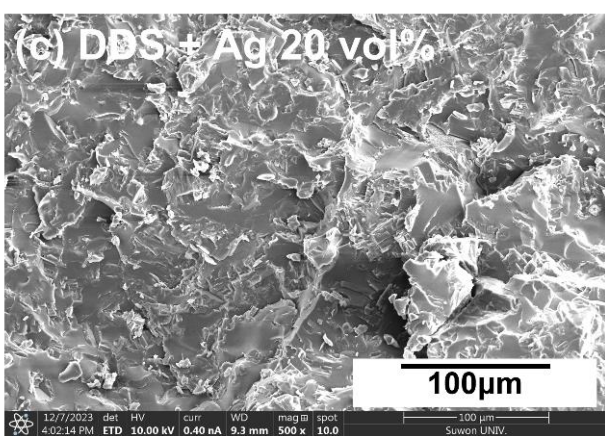

Figure S5. SEM images of fractured surfaces of DGEBA-DDS systems with different metals: (a) None, (b) 20 vol% Bi, and (c) 20 vol% Ag.

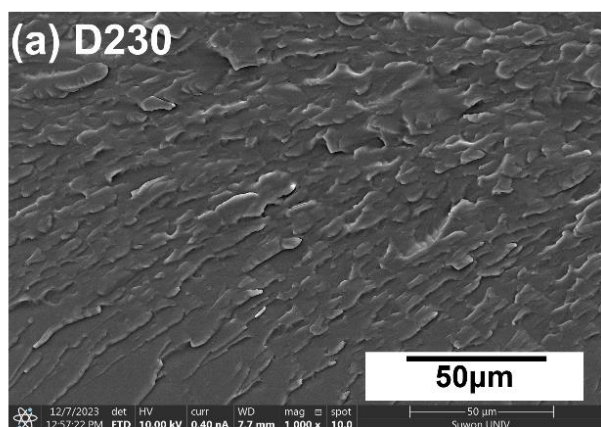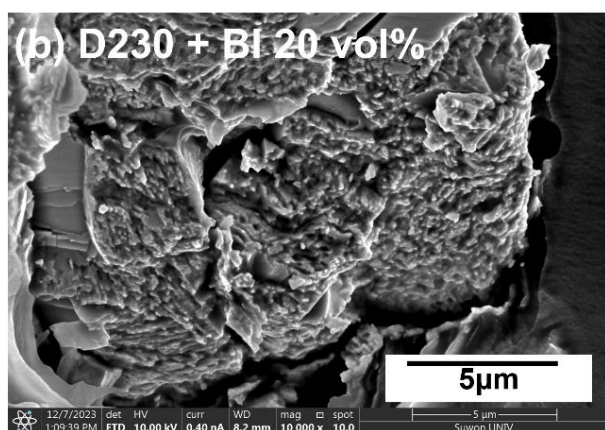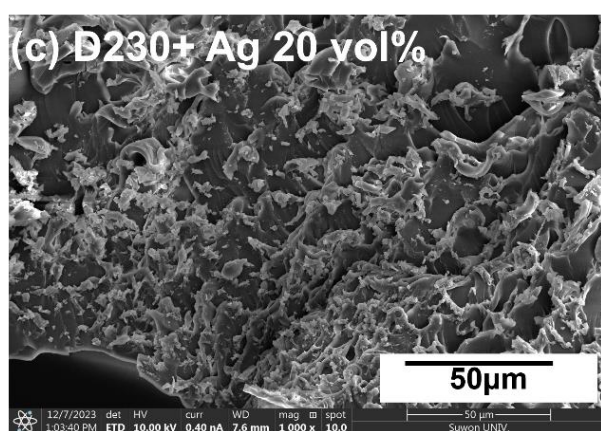

Figure S6. SEM images of fractured surfaces of DGEBA-D230 systems with different metals: (a) None, (b) 20 vol% Bi, and (c) 20 vol% Ag.

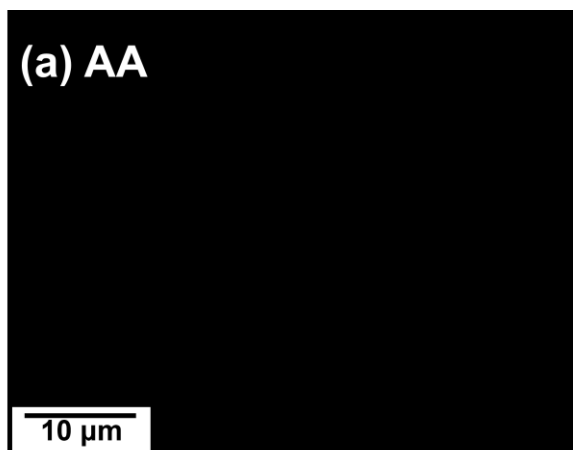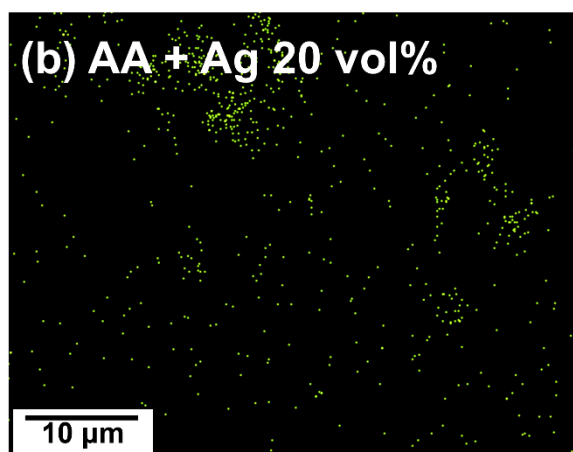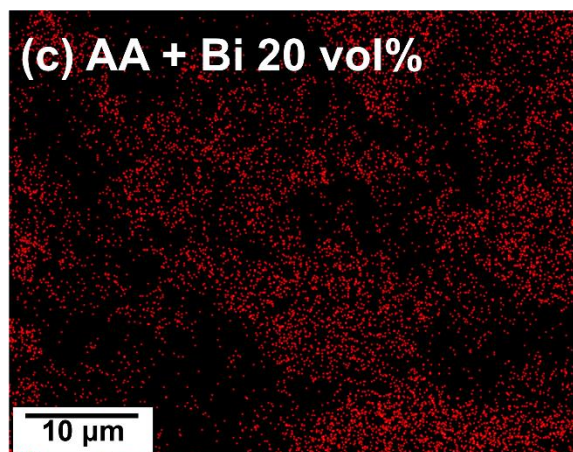

Figure S7. SEM-EDS images of fractured surfaces of DGEBA-AA systems with different metals: (a) None, (b) 20 vol% Bi, and (c) 20 vol% Ag.

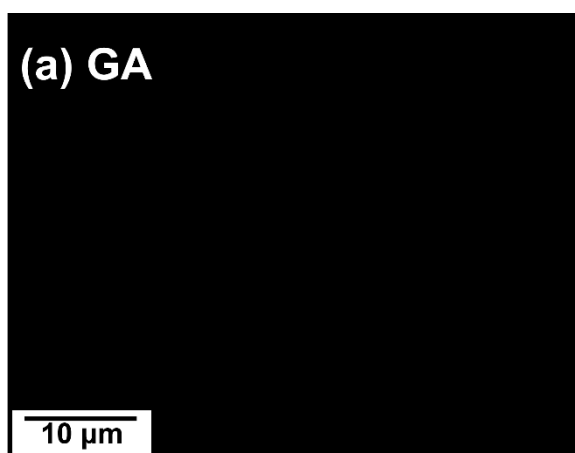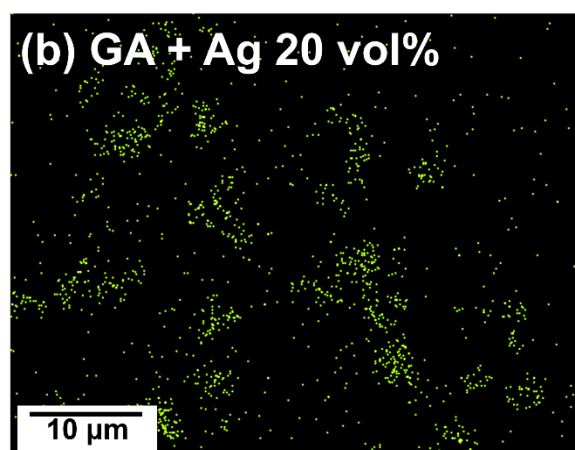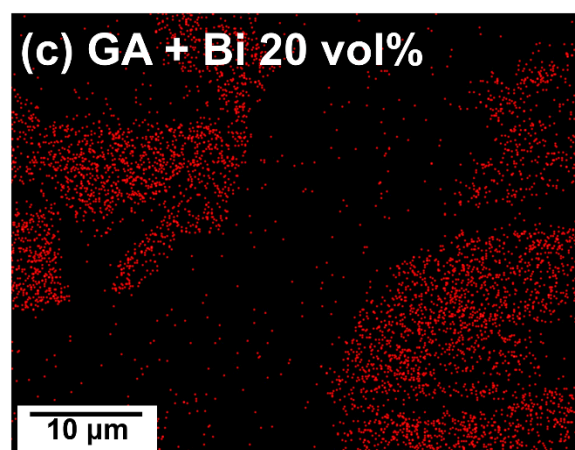

Figure S8. SEM-EDS images of fractured surfaces of DGEBA-GA systems with different metals: (a) None, (b) 20 vol% Bi, and (c) 20 vol% Ag.

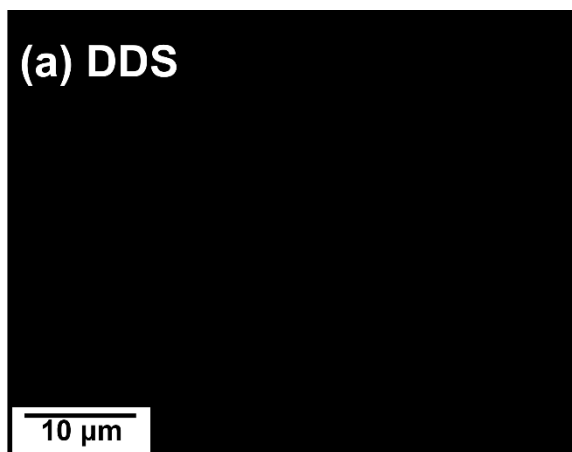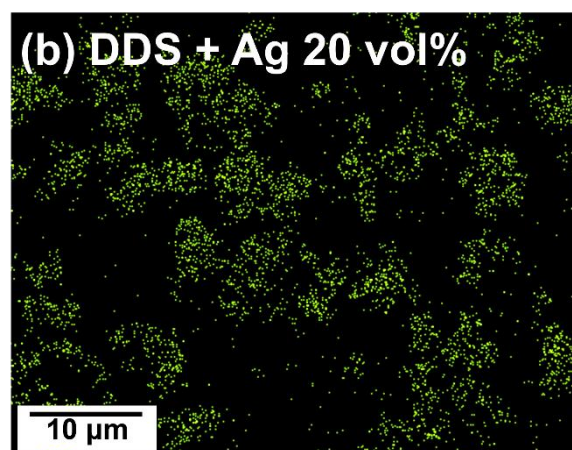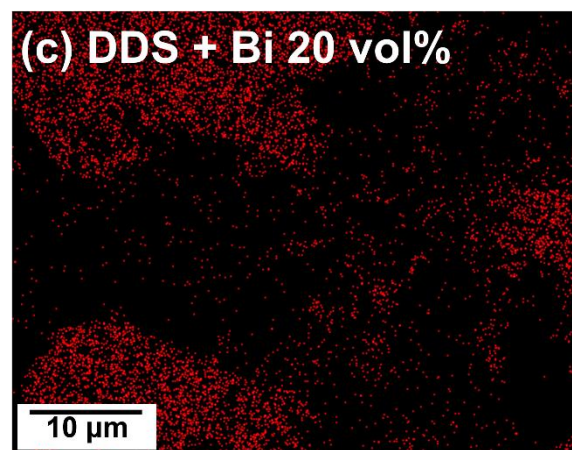

Figure S9. SEM-EDS images of fractured surfaces of DGEBA-DDS systems with different metals: (a) None, (b) 20 vol% Bi, and (c) 20 vol% Ag.



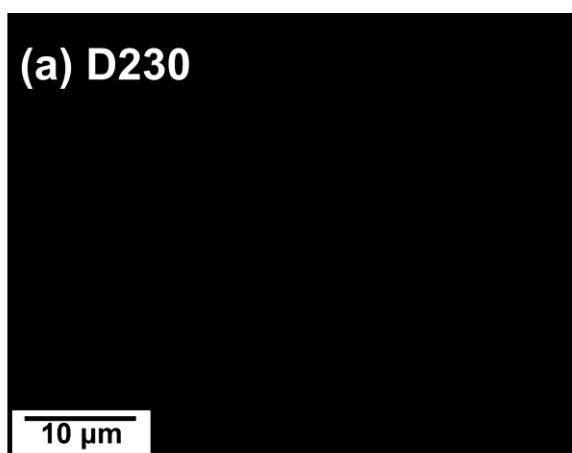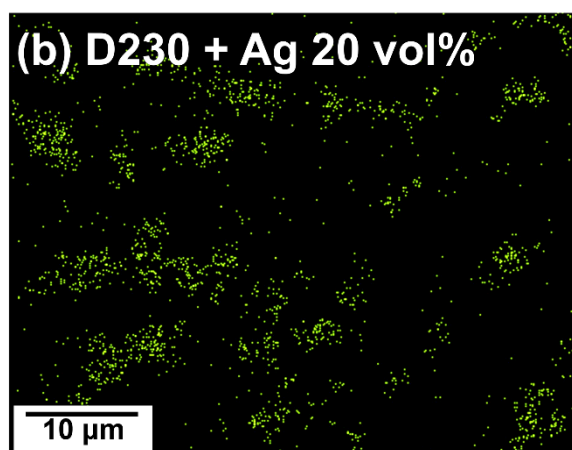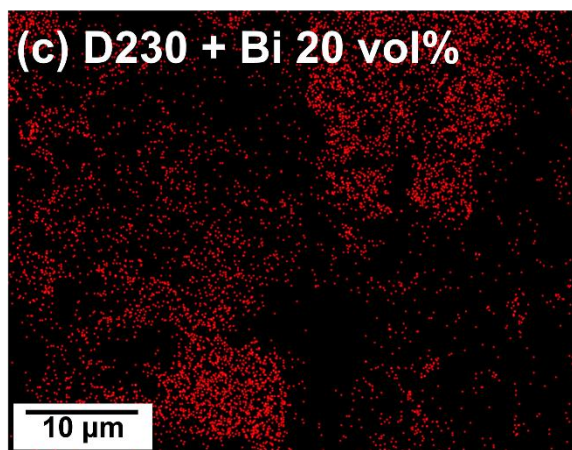

Figure S10. SEM-EDS images of fractured surfaces of DGEBA-D230 systems with different metals: (a) None, (b) 20 vol% Bi, and (c) 20 vol% Ag.

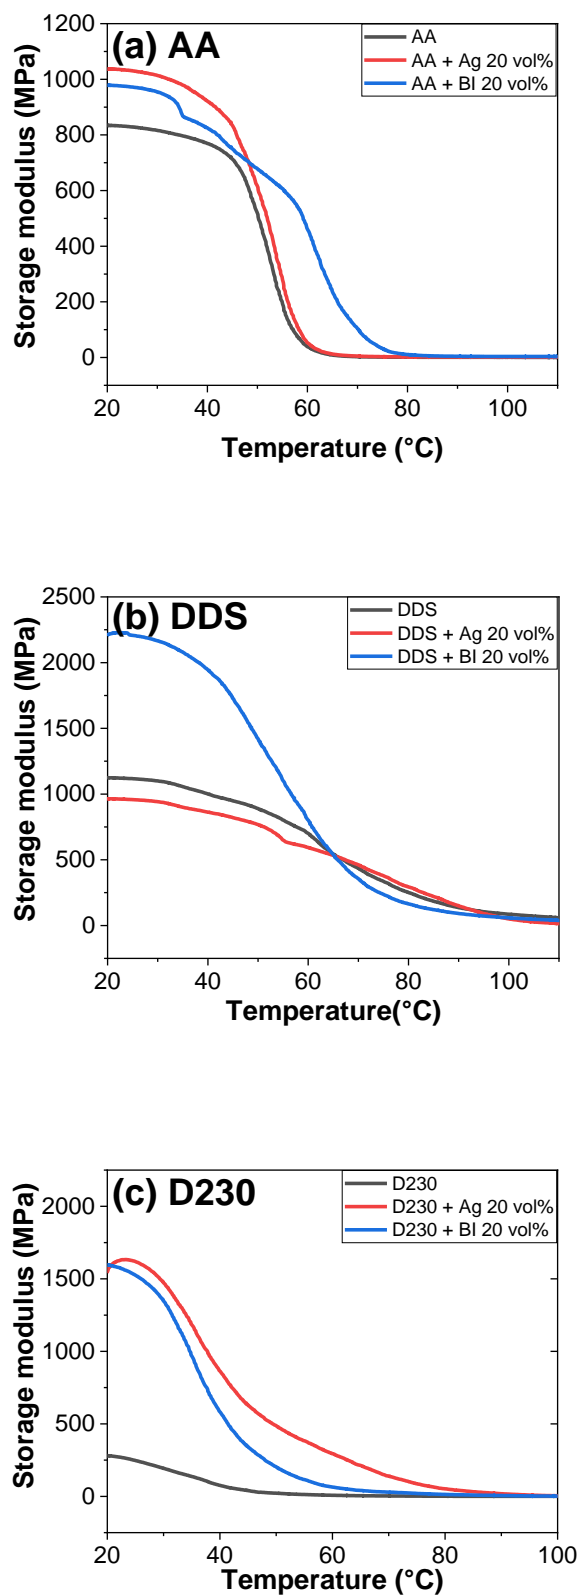

Figure S11. Storage moduli of DGEBA-hardener systems with 20 vol% metal and different hardeners, measured by DMA: (a) AA, (b) DDS, and (c) D230.

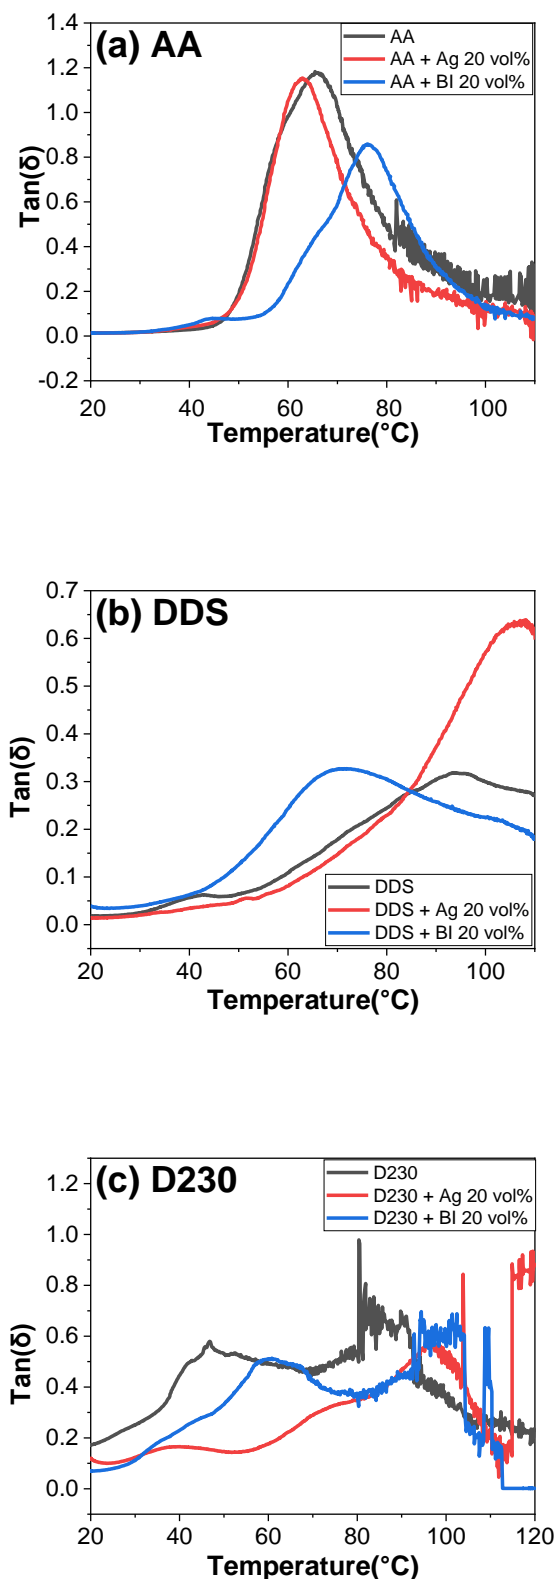

Figure S12. Tan  $\delta$  of DGEBA-hardener systems with 20 vol% metal and different hardeners, measured by DMA: (a) AA, (b) DDS, and (c) D230.
